# Supplementary material
Source: MDPI journal article supplement (https://www.mdpi.com/2227-9717/9/2/281)
Supplement: s1 [file s1]

## **Supporting Information**

### **Coupling microbial electrochemical system and activated carbon biofilter for source-separated greywater treatment**

Mayank Dhadwal, Yang Liu<sup>\*</sup>, Bipro Ranjan Dhar<sup>\*</sup>

Department of Civil and Environmental Engineering, University of Alberta, 9211-116

Street NW, Edmonton, AB, T6G 1H9, Canada

<sup>\*</sup> Corresponding authors.

E-mail address: [bipro@ualberta.ca](mailto:bipro@ualberta.ca) (B.R. Dhar), [yang.liu@ualberta.ca](mailto:yang.liu@ualberta.ca) (Y. Liu)

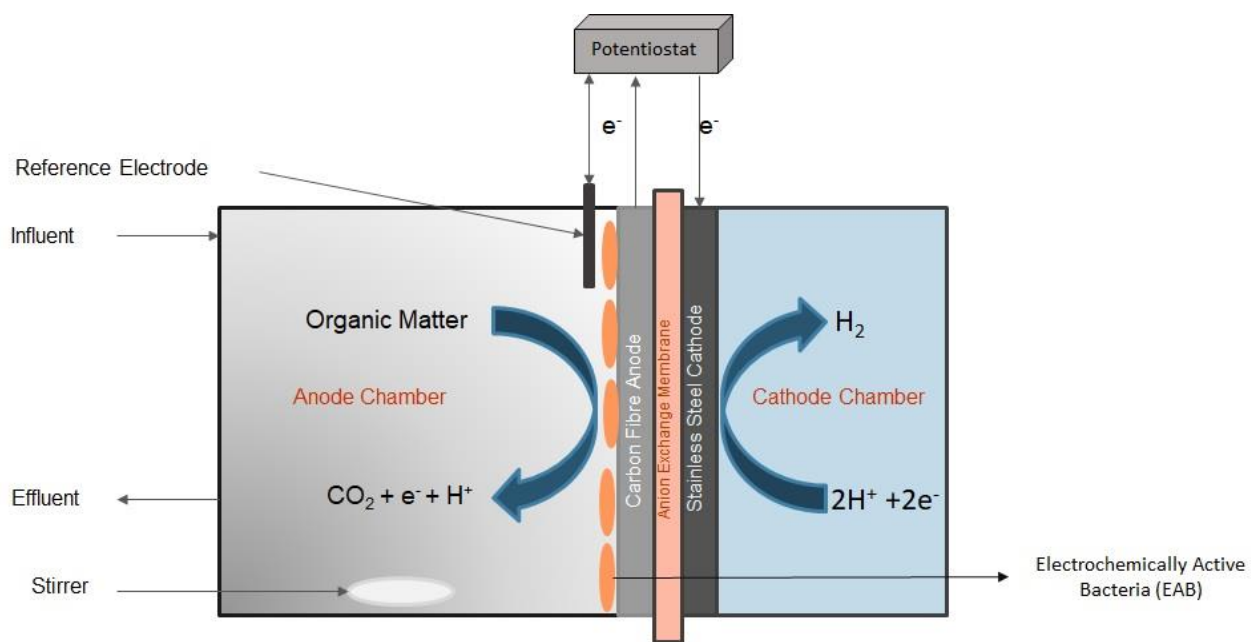

**Fig. S1:** Schematic diagram of microbial electrolysis cell used in this study.

(a)

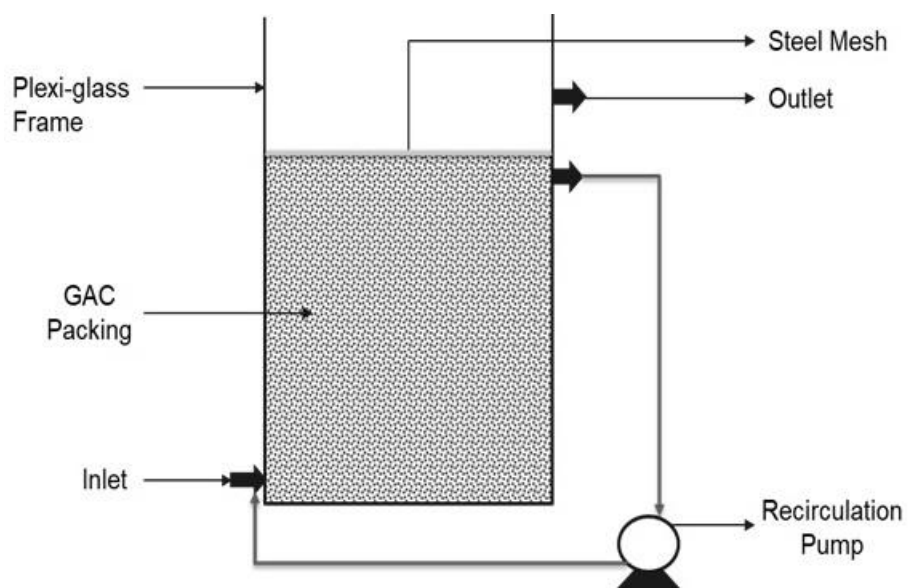

(b)

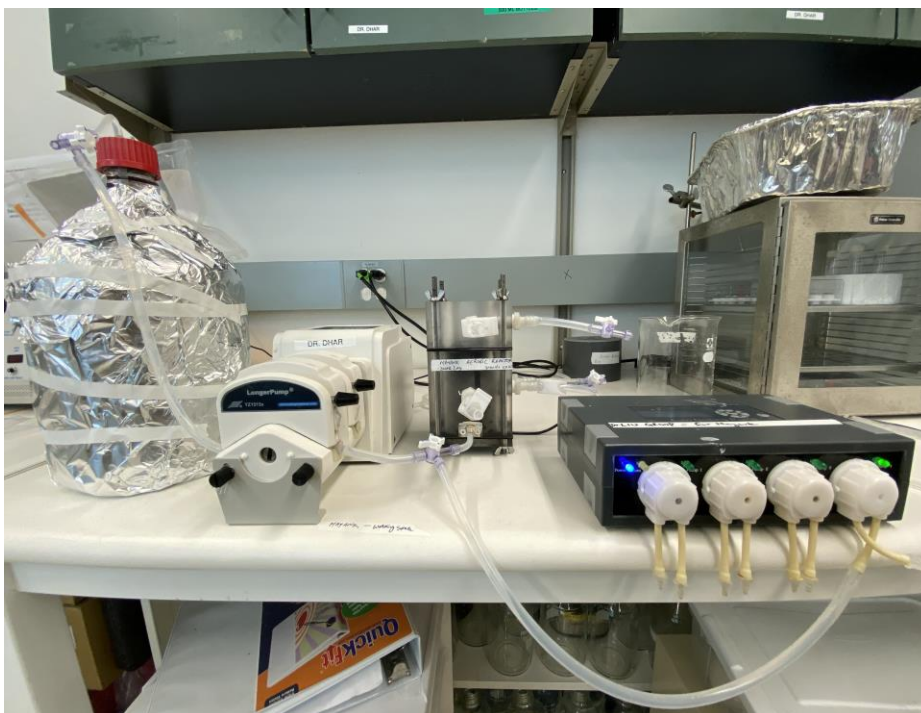

**Fig. S2:** (a) Schematic diagram of granular activated carbon (GAC) biofilter, (b) photograph of GAC biofilter setup.

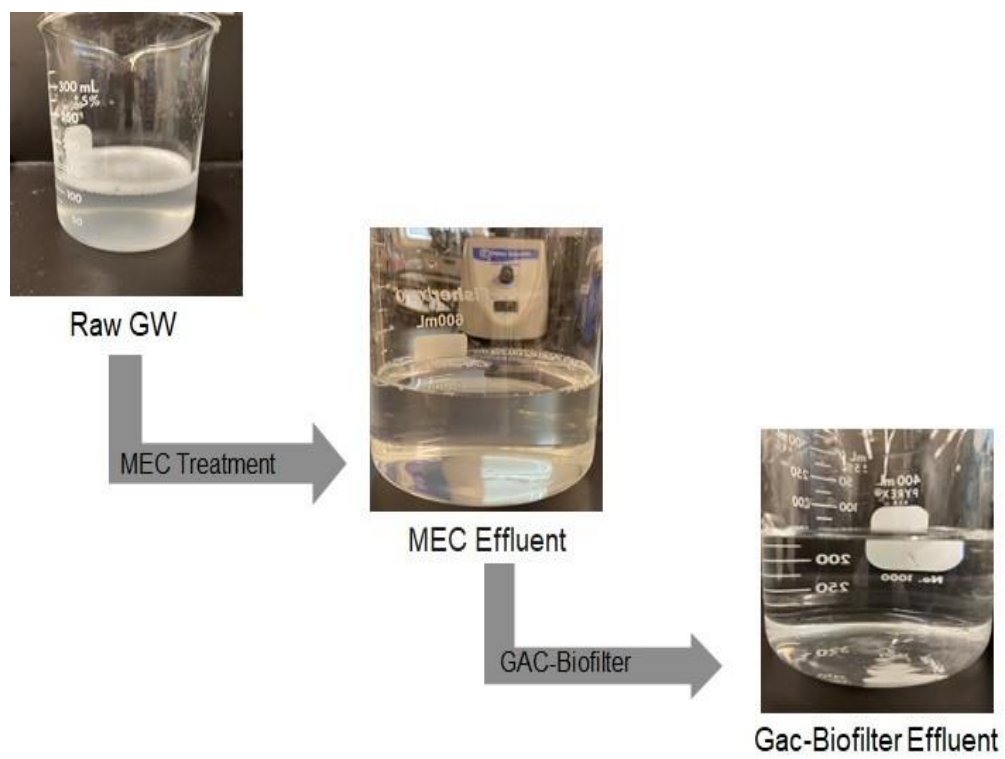

**Fig. S3:** Photographs of raw and treated greywater.

**Table S1:** Results from uninoculated GAC biofilter.

| Contact time (h) | Effluent    |            | TCOD Removal (%) | Surfactant removal (%) |
|------------------|-------------|------------|------------------|------------------------|
|                  | TCOD (mg/L) | LAS (mg/L) |                  |                        |
| 1                | 58±2.5      | 6.8±0.6    | 87.52%           | 88.27%                 |
| 0.5              | 76±1.5      | 10.4±0.4   | 83.65%           | 82.06%                 |

Note. Influent TCOD and LAS concentrations were 465±2 mg/L, and 58 ±0.4 mg/L, respectively.
